# Supplementary material
Source: publisher figshare collection journal article supplement (https://frontiersin.figshare.com/ndownloader/files/23098859)
Supplement: Supplementary file [file 23098859]

Supplemental Figure 1

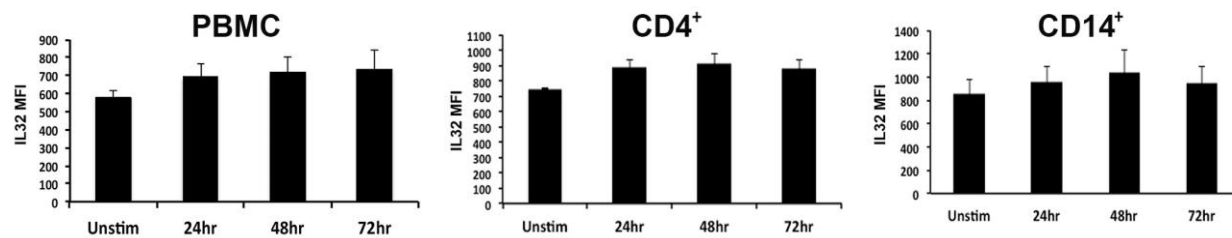

**Supplemental Figure 1. Intracellular staining for IL-32.** Assessment of intracellular expression of IL-32 in PBMCs, CD4<sup>+</sup> and CD14<sup>+</sup> immune cells from 3 HA current inhibitor subjects following FVIII stimulation. These 3 subjects were not part of the original cohort analyzed by RNA-Seq. Antibodies used for staining: anti-CD4-PE (eBioscience), anti-CD14-FITC (eBioscience) and anti-IL32-APC (R&D Systems). A total of  $1 \times 10^6$  PBMC were harvested at the indicated time points. Stained PBMCs were gated on live cells and then CD4<sup>+</sup>/IL32<sup>+</sup> and CD14<sup>+</sup>/IL32<sup>+</sup> populations analyzed. Bar graphs indicate means  $\pm$  SD. \* $p < 0.05$ .
